# Supplementary material for: Markerless motion capture systems as training device in neurological rehabilitation: a systematic review of their use, application, target population and efficacy
Source: PubMed Central journal article supplement (PMC5482943; doi:10.1186/s12984-017-0270-x), 2017-06-24
Supplement: 12984_2017_270_MOESM1_ESM.pdf [file 12984_2017_270_MOESM1_ESM.pdf]

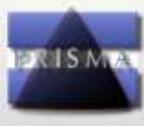

## PRISMA 2009 Flow Diagram

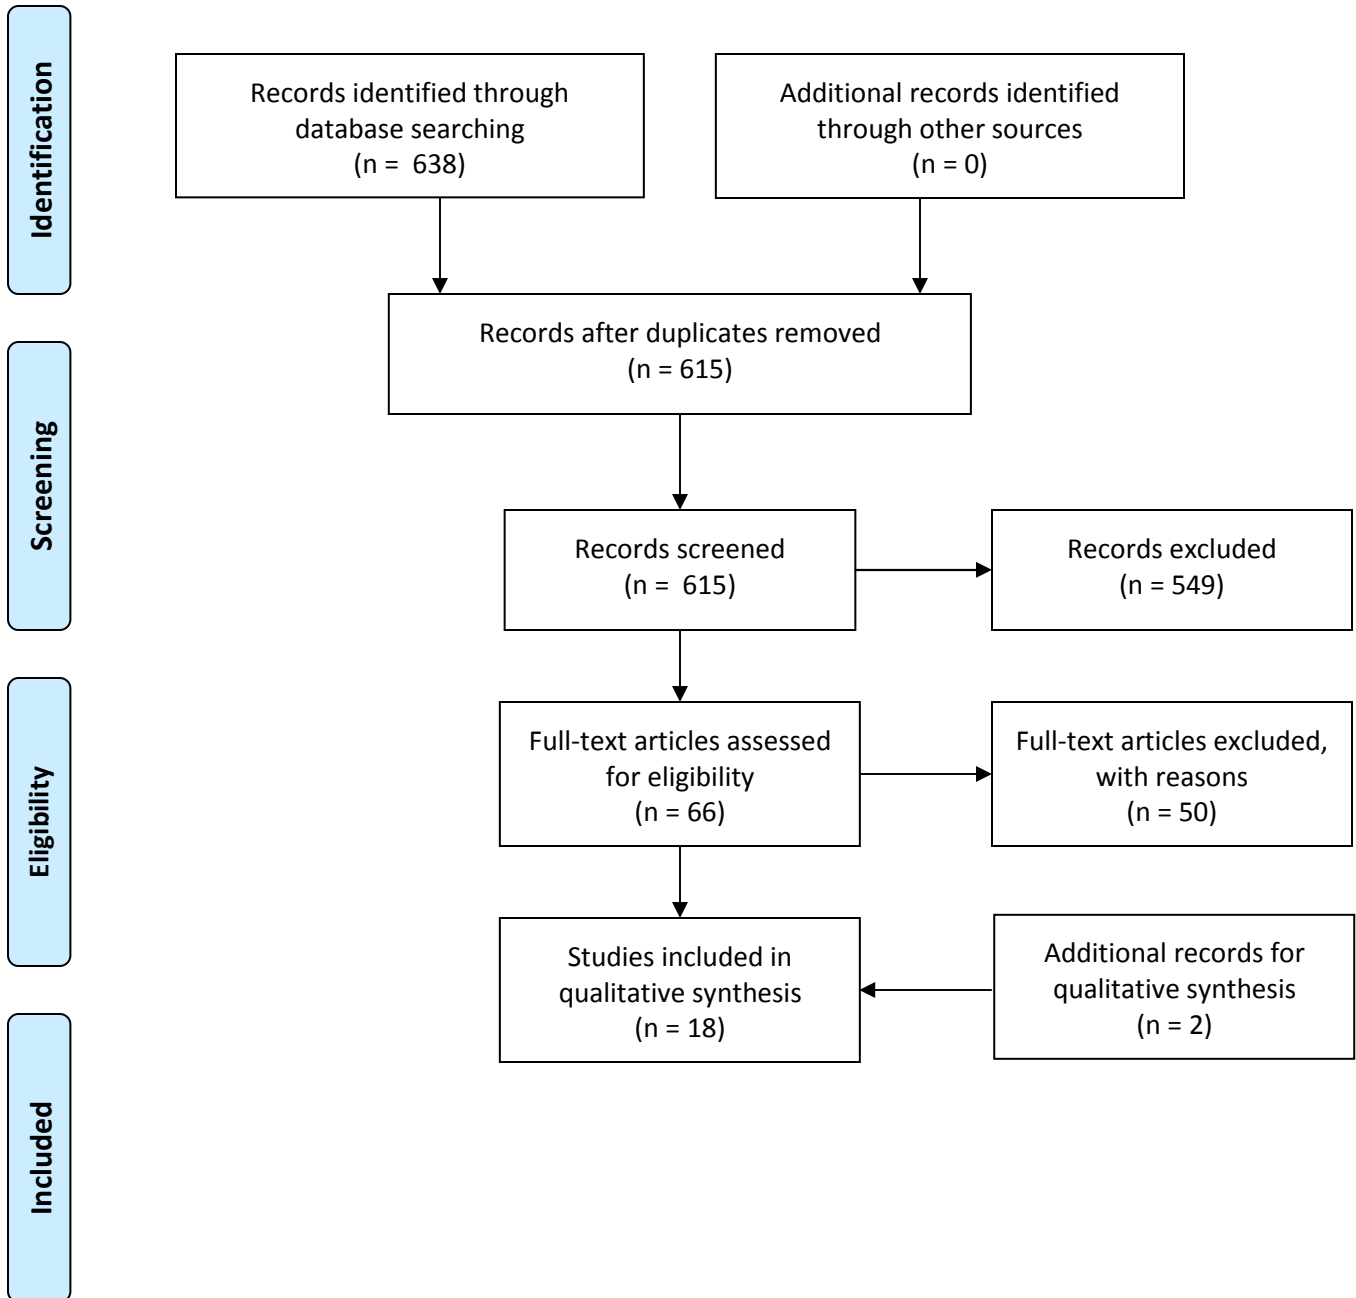

From: Moher D, Liberati A, Tetzlaff J, Altman DG, The PRISMA Group (2009). Preferred Reporting Items for Systematic Reviews and Meta-Analyses: The PRISMA Statement. PLoS Med 6(6): e1000097. doi:10.1371/journal.pmed1000097

For more information, visit [www.prisma-statement.org](http://www.prisma-statement.org).
